# Supplementary material for: Inhibiting stemness and invasive properties of glioblastoma tumorsphere by combined treatment with temozolomide and a newly designed biguanide (HL156A)
Source: PubMed Central journal article supplement (PMC5323181; doi:10.18632/oncotarget.11595), 2016-08-25
Supplement: oncotarget-07-65643-s001.pdf [file oncotarget-07-65643-s001.pdf]

## Inhibiting stemness and invasive properties of glioblastoma tumorsphere by combined treatment with temozolomide and a newly designed biguanide (HL156A)

### SUPPLEMENTARY FIGURES, VIDEOS AND TABLES

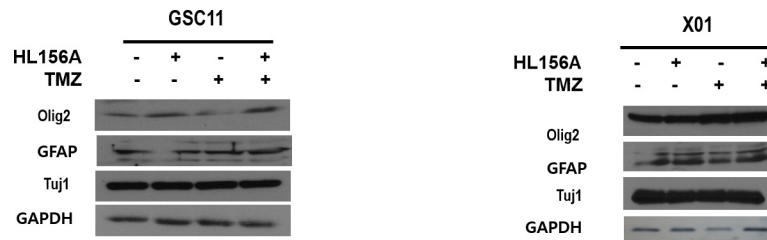

**Supplementary Figure S1: Expression of differentiation markers in GSC11 and X01 sphere.** The treatment of HL156A, TMZ and combination did not alter the expression of differentiation markers.

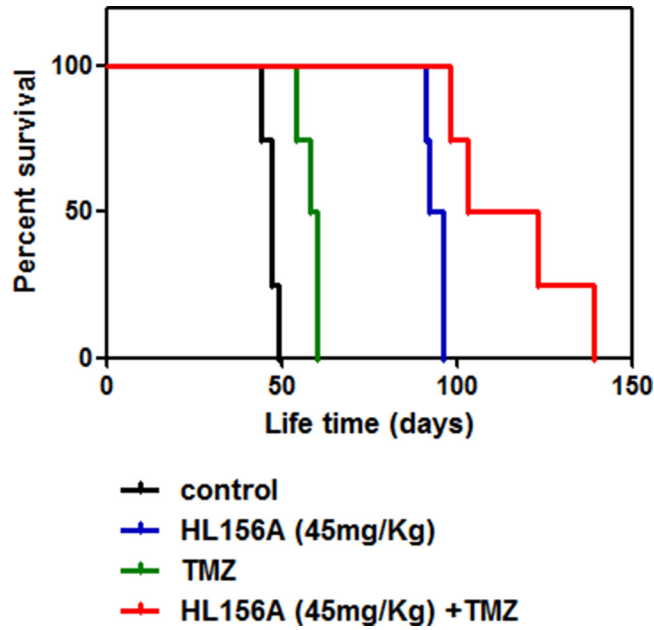

**Supplementary Figure S2: Kaplan-Meier curve of Mice treated with high dose of HL156A(45 mg/kg), TMZ and combination.** Significant survival benefit was observed in HL156A and combination treatment group.

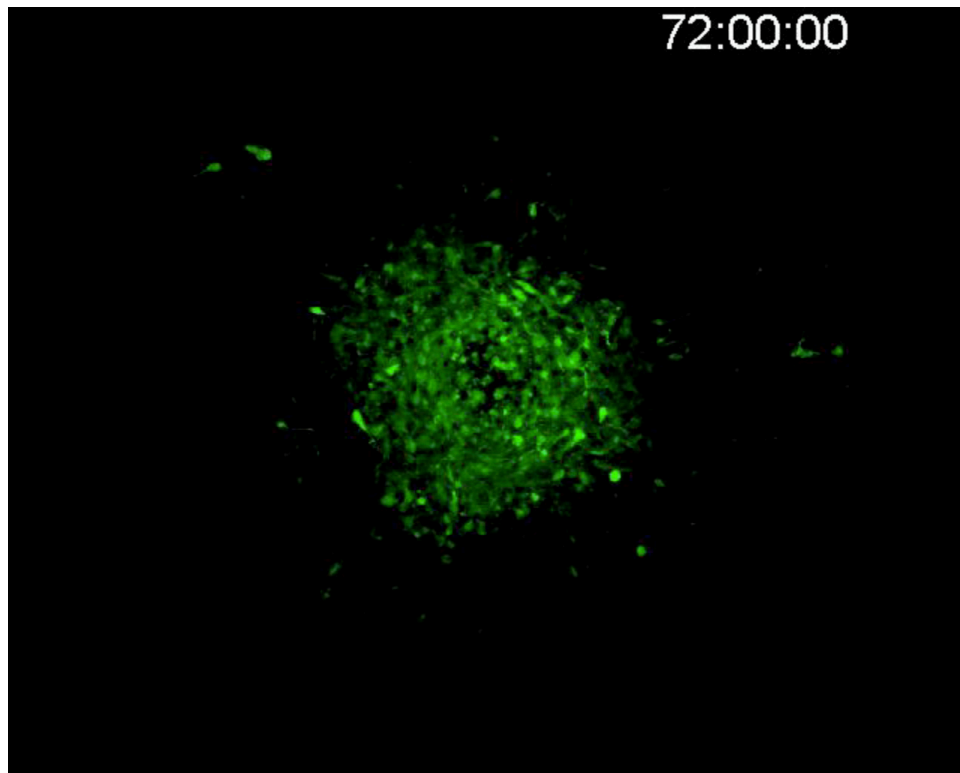

**Supplementary Video S1: Invasion of GSC11 TS in spheroid into 3D collagen-based matrix without treatment of drugs.** GSC11 TS infiltrated dispersedly into collagen-based matrix (confocal GFP image, 65hr movie, 15min interval, 25fpsm, scale bar:100 $\mu$ m).

See Supplementary Video S1

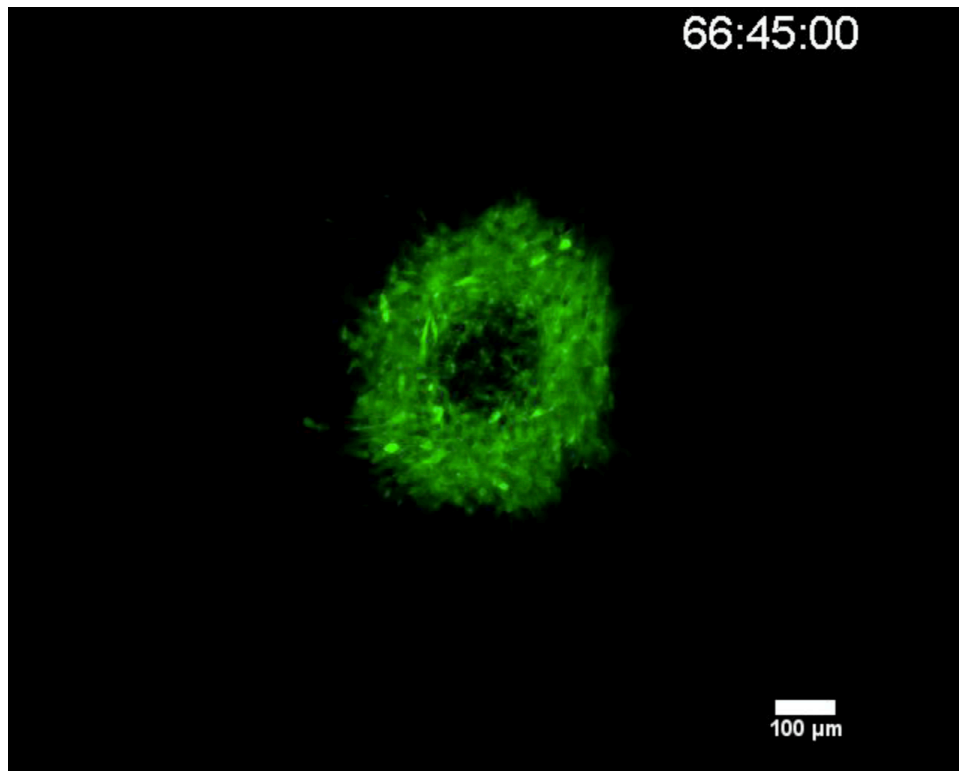

**Supplementary Video S2: Invasion of GSC11 TS in spheroid into 3D collagen-based matrix with treatment of HL156 and TMZ.** Infiltration of GSC11 TS into 3D collagen-based matrix was inhibited by the treatment of the combination of HL156(15  $\mu$ M) and TMZ (500  $\mu$ M) (confocal GFP image, 65hr movie, 15min interval, 25fpsm, scale bar: 100 $\mu$ m).

See Supplementary Video S2

**Supplementary Table S1: Pharmacokinetics of HL156A. Pharmacokinetic parameters of HL156A in mice were given**

| Route                         | IV     |      | PO    |        |
|-------------------------------|--------|------|-------|--------|
|                               | 10     | 3    | 10    | 30     |
| AUC <sub>0-t</sub> (ng.hr/ml) | 1312.1 | 26.6 | 472.6 | 2859.2 |
| AUC <sub>0-∞</sub> (ng.hr/ml) | 1356   | nc   | 504.6 | 2966   |
| C <sub>max</sub> (ng/ml)      | -      | 24.1 | 265   | 961    |
| T <sub>max</sub> (h)          | -      | 0.75 | 0.42  | 0.92   |
| Cl (ml/min/kg)                | 124.9  | -    | -     | -      |
| V <sub>ss</sub> (L/kg)        | 11.9   | -    | -     | -      |
| V <sub>z</sub> (L/kg)         | 18.5   | -    | -     | -      |
| T <sub>1/2</sub> (h)          | 1.7    | nc   | 1.3   | 1.7    |

**nc : Not cognizable**

**Supplementary Table S2: Results of GO analysis. Differentially expressed gene sets between TMZ and combination treatment. Expression of several gene sets related cellular adhesion and migration was significantly different between two groups.**

See Supplementary File 1
